# Supplementary material for: Dual Role of TNF and LTα in Carcinogenesis as Implicated by Studies in Mice
Source: MDPI journal article supplement (doi:10.3390/cancers13081775), 2021-04-08
Supplement: s1 [file s1]

## Supplementary Materials 1:

### Dual role of TNF and LT $\alpha$ in carcinogenesis as implicated by studies in mice

Ekaterina O. Gubernatorova, Almina I. Polinova, Mikhail M. Petropavlovskiy, Olga A. Namakanova, Alexandra D. Medvedovskaya, Ruslan V. Zvartsev, Georgij B. Telegin, Marina S. Drutskaya, Sergei A. Nedospasov

**Table S1.** Anti- and pro-tumorigenic effects of TNF and LT, as implicated by mouse tumor models

| Type of model                    | Experimental mouse model                                      | Genetic background of recipient mice  | Additional experimental procedures | Reported phenotype                                                              | PMID |
|----------------------------------|---------------------------------------------------------------|---------------------------------------|------------------------------------|---------------------------------------------------------------------------------|------|
| Transplantable mouse tumor model | hTNF-expressing chinese hamster ovarian cells (i.m. or s.c.)  | nude mice                             | None                               | Reduced tumor growth                                                            | [1]  |
|                                  | hTNF-expressing EMT6 mammary carcinoma cells (s.c.)           | BALB/c                                | None                               | Reduced tumor growth                                                            | [2]  |
|                                  | TNF-expressing mammary adenocarcinoma TSA cells               |                                       |                                    |                                                                                 | [3]  |
|                                  | mTNF-expressing J558L plasmacytoma cells (s.c.)               |                                       |                                    |                                                                                 | [4]  |
|                                  | mTNF-expressing J558L plasmacytoma cells (s.c.)               | TNFR1/TNFR2 double knockout in BALB/c | None                               | No effect (compared with control cells)                                         | [5]  |
|                                  |                                                               | TNFR1 knockout in BALB/c              | None                               | Reduced tumor growth (compared with control cells)                              |      |
|                                  |                                                               | SCID mice                             | None                               | Reduced tumor growth                                                            |      |
|                                  | mTNF- or hTNF-expressing J558L plasmacytoma cells (s.c.)      | TNFR1 knockout in SCID mice           | None                               | Reduced tumor growth for mTNF, no effect for hTNF (compared with control cells) | [6]  |
|                                  | mTNF-expressing EB T lymphoma cells (s.c.)                    | DBA/2                                 | None                               | Dose-dependent tumor rejection                                                  |      |
|                                  | mTNF-expressing ESB T lymphoma cells (s.c.)                   |                                       | None                               | Increased hepatic metastases formation                                          |      |
|                                  | mTNF-expressing L929 fibrosarcoma cells (s.c.)                | Swiss nude mice                       | None                               | Reduced tumor growth and invasiveness                                           | [7]  |
|                                  | hTNF-expressing PRO4L.7 or 8101 UV-induced tumor cells (s.c.) | C57BL/6                               | None                               | Reduced tumor growth                                                            | [8]  |
|                                  |                                                               | TNFR1 knockout in C57BL/6/129         | None                               | No effect (compared with control cells)                                         |      |
|                                  | hTNF-expressing human                                         | nude mice                             | None                               | Increased tumor invasiveness                                                    | [9]  |

|  |                                                                              |                                                         |                                                                                                      |                                       |      |
|--|------------------------------------------------------------------------------|---------------------------------------------------------|------------------------------------------------------------------------------------------------------|---------------------------------------|------|
|  | ovarian cancer cells (i.p.)                                                  |                                                         |                                                                                                      |                                       |      |
|  | hTNF-non-expressing human ovarian cancer cells (i.p.)                        |                                                         | None                                                                                                 | Reduced tumor growth and invasiveness |      |
|  | Meth A sarcoma cells (i.d.)                                                  | (BALB/c x C57BL/6)F1 hybrid                             | Single injection with hTNF (i.p., i.m. or i.t.)<br>10 days after tumor cell inoculation              | Hemorrhagic tumor necrosis            | [10] |
|  | hTNF-expressing MCA-205 sarcoma cells (s.c.)                                 | C57BL/6                                                 | None                                                                                                 | Reduced tumor growth                  | [11] |
|  | BFS-1 fibrosarcoma cells (i.d.)                                              | tissue-specific LTβ knockout in B or T cells in C57BL/6 | None                                                                                                 | Reduced tumor growth in both cases    | [12] |
|  | mTNF-expressing Py-mT mammary carcinoma cells (under mammary fat pad)        | FVB/nJ                                                  | None                                                                                                 | Increased tumor growth                | [13] |
|  | myc-CaP androgen-dependent prostate cancer cells (s.c.)                      | FVB                                                     | Transfer of BM from mice with tissue-specific LTβ knockout in T cells to lethally irradiated wt mice | No effect                             | [14] |
|  |                                                                              |                                                         | Transfer of BM from mice with tissue-specific LTβ knockout in B cells to lethally irradiated wt mice | Reduced tumor growth in all cases     |      |
|  |                                                                              |                                                         | Multiple injections with sLTβR-Fc fusion protein every 5 days starting 4 days before castration      |                                       |      |
|  |                                                                              |                                                         | LTβ-specific siRNA-expressing myc-CaP androgen-dependent prostate cancer cells (s.c.)                |                                       |      |
|  | EBV-positive nasopharyngeal carcinoma xenografts                             | athymic nude mice                                       | 2 injections with hLTβR-specific siRNA (i.t.)                                                        | Reduced tumor growth                  | [15] |
|  | WiDr human colon adenocarcinoma or HT3 human cervical carcinoma cells (s.c.) |                                                         | Injections with α-hLTβR agonistic Ab (i.p.) every 14 days                                            |                                       | [16] |
|  | ID8 murine ovarian carcinoma cells (i.p.)                                    | C57BL/6                                                 | Transfer of BM from TNFR1 knockout or TNFR1/TNFR2 double                                             | Reduced tumor burden                  | [17] |

|  |                                                                                                   |                                                                                    |                                                                                                                   |                                                                                      |      |
|--|---------------------------------------------------------------------------------------------------|------------------------------------------------------------------------------------|-------------------------------------------------------------------------------------------------------------------|--------------------------------------------------------------------------------------|------|
|  |                                                                                                   |                                                                                    | knockout mice to irradiated wt mice                                                                               |                                                                                      |      |
|  |                                                                                                   | C57BL/6                                                                            | Transfer of BM from TNFR2 knockout mice to irradiated wt mice                                                     | No effect                                                                            |      |
|  |                                                                                                   | TNFR1 knockout in C57BL/6                                                          | None                                                                                                              | Reduced tumor burden                                                                 |      |
|  |                                                                                                   | C57BL/6 with functional TNFR1 only in CD19 <sup>+</sup> or LysM <sup>+</sup> cells | None                                                                                                              | Reduced tumor burden                                                                 |      |
|  |                                                                                                   | C57BL/6 with functional TNFR1 only in CD4 <sup>+</sup> cells                       | None                                                                                                              | No effect                                                                            |      |
|  | PancTul, Colo357 or BxPc3 human pancreatic adenocarcinoma cells (orthotypically)                  | SCID/bg mice                                                                       | Injections with TNF (i.p.) on days 3, 6, 9, and 12 after tumor cell inoculation                                   | Increased tumor growth and metastasis                                                | [18] |
|  |                                                                                                   |                                                                                    | Multiple injections with etanercept or infliximab (i.p.) after tumor cell inoculation                             | Reduced tumor growth and metastasis                                                  |      |
|  |                                                                                                   |                                                                                    | Subtotal pancreatectomy and multiple injections with etanercept or infliximab (i.p.) after tumor cell inoculation | Reduced tumor regrowth and metastasis                                                |      |
|  | Human xenografts from bowel or breast carcinomas (s.c.)                                           | athymic nude mice, mixed background                                                | Daily injections with rhTNF (i.p. or i.t.)                                                                        | Reduced tumor size                                                                   | [19] |
|  | J558L plasmacytoma, FB61 TNFR1 <sup>-/-</sup> or FD99 TNFR1/2 <sup>-/-</sup> sarcoma cells (s.c.) | TNFR1/TNFR2 double knockout in BALB/c                                              | None                                                                                                              | Increased incidence of tumor rejection                                               | [20] |
|  | FB61 TNFR1 <sup>-/-</sup> sarcoma cells (s.c.)                                                    | BALB/c                                                                             | Adoptive transfer of spleen MDSC from TNFR1/TNFR2 double knockout mice to wt mice before tumor cells inoculation  | Reduced tumor growth, compared with transfer from wt mice                            |      |
|  |                                                                                                   | BALB/c                                                                             | Adoptive transfer of spleen MDSC from wt mice to TNFR1/TNFR2 double knockout mice before tumor cells inoculation  | Increased tumor growth, compared with transfer from TNFR1/TNFR2 double knockout mice |      |
|  | J558L plasmacytoma, FB61                                                                          | BALB/c                                                                             | Injections with $\alpha$ -TNF                                                                                     | Increased incidence of tumor                                                         |      |

|                                      |                                                                         |                                                                                                                                                                   |                                                                                                                                   |                                                                 |       |
|--------------------------------------|-------------------------------------------------------------------------|-------------------------------------------------------------------------------------------------------------------------------------------------------------------|-----------------------------------------------------------------------------------------------------------------------------------|-----------------------------------------------------------------|-------|
|                                      | TNFR1 <sup>-/-</sup> sarcoma or TSA mammary adenocarcinoma cells (s.c.) |                                                                                                                                                                   | (i.p.) every 5 days starting at 2 days before tumor inoculation                                                                   | rejection and reduced tumor growth                              |       |
|                                      | FB61 TNFR1 <sup>-/-</sup> sarcoma cells (s.c.)                          | TNFR1 knockout in BALB/c                                                                                                                                          | None                                                                                                                              | No effect                                                       |       |
|                                      |                                                                         | TNFR2 knockout or TNFR1/TNFR2 double knockout in BALB/c                                                                                                           | None                                                                                                                              | Increased incidence of tumor rejection and reduced tumor growth |       |
| Chemically-induced mouse tumor model | MCA-induced sarcoma                                                     | TNF knockout in C57BL/6                                                                                                                                           | None                                                                                                                              | Increased tumor incidence                                       | [21]  |
|                                      |                                                                         | C57BL/6                                                                                                                                                           | Transfer of BM from LT $\alpha$ knockout, LIGHT knockout or LT $\beta$ /LIGHT double knockout mice to lethally irradiated wt mice | Increased tumor incidence and size                              | [22]  |
|                                      | MNU/testosterone-induced prostate cancer                                | TNFR1 knockout in B6.129, C57BL/6 as controls                                                                                                                     | None                                                                                                                              | Reduced incidence of adenocarcinoma                             | [23]  |
| Spontaneous mouse tumor model        | Spontaneous lung cancer                                                 | CC-LR/TNF-Tg mice, mixed 129SvJ x C57BL/6 background                                                                                                              | None                                                                                                                              | Increased tumor growth and number (compared with CC-LR mice)    | [24]  |
|                                      |                                                                         |                                                                                                                                                                   | MDSC depletion                                                                                                                    | Reduced tumor number (compared with CC-LR/TNF-Tg mice)          |       |
|                                      |                                                                         | CC-LR/TNF-KO mice, mixed 129SvJ x C57BL/6 background                                                                                                              | None                                                                                                                              | Reduced tumor growth and number (compared with CC-LR mice)      |       |
|                                      | Spontaneous holestatic hepatitis                                        | Mdr-2 deficient mice                                                                                                                                              | Injections with $\alpha$ -TNF (i.p.) for 3 days                                                                                   | Apoptosis of transformed hepatocytes                            | [25]  |
|                                      | Spontaneous hepatitis and hepatocellular carcinoma (HCC)                | TNFR1 knockout in Abl-LT transgenic mice                                                                                                                          | None                                                                                                                              | No effect                                                       | [26]  |
|                                      |                                                                         | Abl-LT transgenic mice                                                                                                                                            | Multiple injections with $\alpha$ -LT $\beta$ R antagonistic Ab                                                                   | Reduced incidence of HCC                                        |       |
|                                      | Spontaneous tumors                                                      | TNF knockout, TNFR1 knockout, LT $\alpha$ knockout or TNF/LT $\alpha$ double knockout in p53 <sup>-/-</sup> and p53 <sup>+/-</sup> mice, mixed C57BL/6 background | None                                                                                                                              | No effect                                                       | [27]* |
|                                      | Spontaneous prostate adenocarcinoma                                     | Heterozygous or homologous deletion of LT $\alpha$ gene in TRAMP mice, C57BL/6 background                                                                         | None                                                                                                                              | Reduced tumor incidence, growth and metastasis                  | [28]* |
|                                      |                                                                         | TRAMP mice, C57BL/6 background                                                                                                                                    | 3 weekly injections with sLT $\beta$ R-Fc fusion                                                                                  |                                                                 |       |

|  |                                                  |                                                                                                                     | protein (i.p.)                                                                                |                                    |       |
|--|--------------------------------------------------|---------------------------------------------------------------------------------------------------------------------|-----------------------------------------------------------------------------------------------|------------------------------------|-------|
|  | Spontaneous intestinal-type gastric tumors       | TNF knockout in mice with transgenic expression of <i>Wnt1</i> , <i>Ptgs2</i> and <i>Ptges</i> , mixed background   | None                                                                                          | Reduced tumor size, but not number | [29]* |
|  |                                                  | Mice with transgenic expression of <i>Wnt1</i> , <i>Ptgs2</i> and <i>Ptges</i> , mixed background                   | Transfer of BM from mice with intact TNF signaling to lethally irradiated TNF knockout mice   | Increased tumor size               |       |
|  |                                                  | TNFR1 knockout in mice with transgenic expression of <i>Wnt1</i> , <i>Ptgs2</i> and <i>Ptges</i> , mixed background | None                                                                                          | Reduced tumor size                 |       |
|  |                                                  | Mice with transgenic expression of <i>Wnt1</i> , <i>Ptgs2</i> and <i>Ptges</i> , mixed background                   | Transfer of BM from TNFR1 knockout mice to lethally irradiated mice with intact TNF signaling |                                    |       |
|  | Spontaneous T-cell acute lymphoblastic leukaemia | TJ2-Tg in C57BL/6                                                                                                   | Multiple injections with neutralizing LTβR-Fc fusion protein (i.p.) for 5 consecutive weeks   | Increased survival                 | [30]  |
|  |                                                  | TJ2-Tg LT8R knockout in C57BL/6                                                                                     | None                                                                                          |                                    |       |

hTNF – human TNF, i.m. – intramuscular, s.c. – subcutaneous, mTNF –mouse TNF, i.p. – intraperitoneal, i.d. – intradermal, i.t. – intratumoral, BM – bone marrow, siRNA – small interfering RNA, α- – anti-, hLTβR – human LTβR, rhTNF – recombinant hTNF, MCA – methylcholanthrene, MNU - N-Methyl-N-nitrosourea,

CC-LR/TNF-Tg mice - lung specific K-ras mutant mice with airway epithelial specific TNF overexpression, MDSC - myeloid-derived suppressor cells, CC-LR/TNF-KO mice - lung specific K-ras mutant mice with genetic knockout of TNF, Abl-LT transgenic mice – mice with overexpression of LTα and LTβ in liver, TJ2-Tg - ELSRa-TEL-JAK2 transgenic mice. \* littermate controls were used in these studies.

## References

1. Oliff, A.; Defeo-Jones, D.; Boyer, M.; Martinez, D.; Kiefer, D.; Vuocolo, G.; Wolfe, A.; Socher, S.H. Tumors secreting human TNF/cachectin induce cachexia in mice. *Cell* **1987**, *50*, 555-563, doi:10.1016/0092-8674(87)90028-6.
2. Matory, Y.L.; Dorfman, D.M.; Wu, L.; Chen, M.; Goedegebuure, P.; Eberlein, T.J. Treatment of established tumor is associated with ICAM-1 upregulation and reversed by CD8 depletion in a tumor necrosis factor-α gene transfected mouse mammary tumor. *Pathobiology* **1999**, *67*, 186-195, doi:10.1159/000028071.
3. Musiani, P.; Allione, A.; Modica, A.; Lollini, P.L.; Giovarelli, M.; Cavallo, F.; Belardelli, F.; Forni, G.; Modesti, A. Role of neutrophils and lymphocytes in inhibition of a mouse mammary adenocarcinoma engineered to release IL-2, IL-4, IL-7, IL-10, IFN-α, IFN-γ, and TNF-α. *Lab Invest* **1996**, *74*, 146-157.
4. Blankenstein, T.; Qin, Z.H.; Uberla, K.; Muller, W.; Rosen, H.; Volk, H.D.; Diamantstein, T. Tumor suppression after tumor cell-targeted tumor necrosis factor α gene transfer. *J Exp Med* **1991**, *173*, 1047-1052, doi:10.1084/jem.173.5.1047.

5. Zhao, X.; Mohaupt, M.; Jiang, J.; Liu, S.; Li, B.; Qin, Z. Tumor necrosis factor receptor 2-mediated tumor suppression is nitric oxide dependent and involves angiostasis. *Cancer Res* **2007**, *67*, 4443-4450, doi:10.1158/0008-5472.CAN-07-0185.
6. Qin, Z.; Kruger-Krasagakes, S.; Kunzendorf, U.; Hock, H.; Diamantstein, T.; Blankenstein, T. Expression of tumor necrosis factor by different tumor cell lines results either in tumor suppression or augmented metastasis. *J Exp Med* **1993**, *178*, 355-360, doi:10.1084/jem.178.1.355.
7. Vanhaesebroeck, B.; Mareel, M.; Van Roy, F.; Grooten, J.; Fiers, W. Expression of the tumor necrosis factor gene in tumor cells correlates with reduced tumorigenicity and reduced invasiveness in vivo. *Cancer Res* **1991**, *51*, 2229-2238.
8. Wu, T.H.; Pabin, C.N.; Qin, Z.; Blankenstein, T.; Philip, M.; Dignam, J.; Schreiber, K.; Schreiber, H. Long-term suppression of tumor growth by TNF requires a Stat1- and IFN regulatory factor 1-dependent IFN-gamma pathway but not IL-12 or IL-18. *Journal of immunology* **2004**, *172*, 3243-3251, doi:10.4049/jimmunol.172.5.3243.
9. Kulbe, H.; Thompson, R.; Wilson, J.L.; Robinson, S.; Hagemann, T.; Fatah, R.; Gould, D.; Ayhan, A.; Balkwill, F. The inflammatory cytokine tumor necrosis factor- $\alpha$  generates an autocrine tumor-promoting network in epithelial ovarian cancer cells. *Cancer Res* **2007**, *67*, 585-592, doi:10.1158/0008-5472.CAN-06-2941.
10. Pennica, D.; Nedwin, G.E.; Hayflick, J.S.; Seeburg, P.H.; Derynck, R.; Palladino, M.A.; Kohr, W.J.; Aggarwal, B.B.; Goeddel, D.V. Human tumour necrosis factor: precursor structure, expression and homology to lymphotoxin. *Nature* **1984**, *312*, 724-729, doi:10.1038/312724a0.
11. Asher, A.L.; Mule, J.J.; Kasid, A.; Restifo, N.P.; Salo, J.C.; Reichert, C.M.; Jaffe, G.; Fendly, B.; Kriegler, M.; Rosenberg, S.A. Murine tumor cells transduced with the gene for tumor necrosis factor- $\alpha$ . Evidence for paracrine immune effects of tumor necrosis factor against tumors. *Journal of immunology* **1991**, *146*, 3227-3234.
12. Daller, B.; Musch, W.; Rohrl, J.; Tumanov, A.V.; Nedospasov, S.A.; Mannel, D.N.; Schneider-Brachert, W.; Hehlhans, T. Lymphotoxin-beta receptor activation by lymphotoxin- $\alpha$ (1) $\beta$ (2) and LIGHT promotes tumor growth in an NF $\kappa$ B-dependent manner. *Int J Cancer* **2011**, *128*, 1363-1370, doi:10.1002/ijc.25456.
13. Li, B.; Vincent, A.; Cates, J.; Brantley-Sieders, D.M.; Polk, D.B.; Young, P.P. Low levels of tumor necrosis factor  $\alpha$  increase tumor growth by inducing an endothelial phenotype of monocytes recruited to the tumor site. *Cancer Res* **2009**, *69*, 338-348, doi:10.1158/0008-5472.CAN-08-1565.
14. Ammirante, M.; Luo, J.L.; Grivnenkov, S.; Nedospasov, S.; Karin, M. B-cell-derived lymphotoxin promotes castration-resistant prostate cancer. *Nature* **2010**, *464*, 302-305, doi:10.1038/nature08782.
15. Or, Y.Y.; Chung, G.T.; To, K.F.; Chow, C.; Choy, K.W.; Tong, C.Y.; Leung, A.W.; Hui, A.B.; Tsao, S.W.; Ng, H.K., et al. Identification of a novel 12p13.3 amplicon in nasopharyngeal carcinoma. *J Pathol* **2010**, *220*, 97-107, doi:10.1002/path.2609.
16. Lukashev, M.; LePage, D.; Wilson, C.; Bailly, V.; Garber, E.; Lukashin, A.; Ngam-ek, A.; Zeng, W.; Allaire, N.; Perrin, S., et al. Targeting the lymphotoxin-beta receptor with agonist antibodies as a potential cancer therapy. *Cancer Res* **2006**, *66*, 9617-9624, doi:10.1158/0008-5472.CAN-06-0217.
17. Charles, K.A.; Kulbe, H.; Soper, R.; Escorcio-Correia, M.; Lawrence, T.; Schultheis, A.; Chakravarty, P.; Thompson, R.G.; Kollias, G.; Smyth, J.F., et al. The tumor-promoting actions of TNF- $\alpha$  involve TNFR1 and IL-17 in ovarian cancer in mice and humans. *J Clin Invest* **2009**, *119*, 3011-3023, doi:10.1172/JCI39065.
18. Egberts, J.H.; Cloosters, V.; Noack, A.; Schniewind, B.; Thon, L.; Klose, S.; Kettler, B.; von Forstner, C.; Kneitz, C.; Tepel, J., et al. Anti-tumor necrosis factor therapy inhibits pancreatic tumor growth and metastasis. *Cancer Res* **2008**, *68*, 1443-1450, doi:10.1158/0008-5472.CAN-07-5704.
19. Balkwill, F.R.; Lee, A.; Aldam, G.; Moodie, E.; Thomas, J.A.; Tavernier, J.; Fiers, W. Human tumor xenografts treated with recombinant human tumor necrosis factor alone or in combination with interferons. *Cancer Res* **1986**, *46*, 3990-3993.
20. Zhao, X.; Rong, L.; Zhao, X.; Li, X.; Liu, X.; Deng, J.; Wu, H.; Xu, X.; Erben, U.; Wu, P., et al. TNF signaling drives myeloid-derived suppressor cell accumulation. *J Clin Invest* **2012**, *122*, 4094-4104, doi:10.1172/JCI64115.
21. Swann, J.B.; Vesely, M.D.; Silva, A.; Sharkey, J.; Akira, S.; Schreiber, R.D.; Smyth, M.J. Demonstration of inflammation-induced cancer and cancer immunoediting during primary tumorigenesis. *Proceedings of the National Academy of Sciences of the United States of America* **2008**, *105*, 652-656, doi:10.1073/pnas.0708594105.
22. Hu, X.; Zimmerman, M.A.; Bardhan, K.; Yang, D.; Waller, J.L.; Liles, G.B.; Lee, J.R.; Pollock, R.; Lev, D.; Ware, C.F., et al. Lymphotoxin beta receptor mediates caspase-dependent tumor cell apoptosis in vitro and tumor suppression in vivo despite induction of NF- $\kappa$ B activation. *Carcinogenesis* **2013**, *34*, 1105-1114, doi:10.1093/carcin/bgt014.

23. Galheigo, M.R.; Cruz, A.R.; Cabral, A.S.; Faria, P.R.; Cordeiro, R.S.; Silva, M.J.; Tomiosso, T.C.; Goncalves, B.F.; Pinto-Fochi, M.E.; Taboga, S.R., et al. Role of the TNF-alpha receptor type 1 on prostate carcinogenesis in knockout mice. *Prostate* **2016**, *76*, 917-926, doi:10.1002/pros.23181.
24. Gong, L.; da Silva Caetano, M.; Cumpian, A.M.; Daliri, S.; Garza Flores, A.; Chang, S.H.; Ochoa, C.E.; Evans, C.M.; Yu, Z.; Moghaddam, S.J. Tumor necrosis factor links chronic obstructive pulmonary disease and K-ras mutant lung cancer through induction of an immunosuppressive pro-tumor microenvironment. *Oncoimmunology* **2016**, *5*, e1229724, doi:10.1080/2162402X.2016.1229724.
25. Pikarsky, E.; Porat, R.M.; Stein, I.; Abramovitch, R.; Amit, S.; Kasem, S.; Gutkovich-Pyest, E.; Urieli-Shoval, S.; Galun, E.; Ben-Neriah, Y. NF-kappaB functions as a tumour promoter in inflammation-associated cancer. *Nature* **2004**, *431*, 461-466, doi:10.1038/nature02924.
26. Haybaeck, J.; Zeller, N.; Wolf, M.J.; Weber, A.; Wagner, U.; Kurrer, M.O.; Bremer, J.; Iezzi, G.; Graf, R.; Clavien, P.A., et al. A lymphotoxin-driven pathway to hepatocellular carcinoma. *Cancer Cell* **2009**, *16*, 295-308, doi:10.1016/j.ccr.2009.08.021.
27. Kuprash, D.V.; Qin, Z.; Ito, D.; Grivennikov, S.I.; Abe, K.; Drutskaya, L.N.; Blankenstein, T.; Nedospasov, S.A. Ablation of TNF or lymphotoxin signaling and the frequency of spontaneous tumors in p53-deficient mice. *Cancer letters* **2008**, *268*, 70-75, doi:10.1016/j.canlet.2008.03.023.
28. Zhou, P.; Fang, X.; McNally, B.A.; Yu, P.; Zhu, M.; Fu, Y.X.; Wang, L.; Liu, Y.; Zheng, P. Targeting lymphotoxin-mediated negative selection to prevent prostate cancer in mice with genetic predisposition. *Proceedings of the National Academy of Sciences of the United States of America* **2009**, *106*, 17134-17139, doi:10.1073/pnas.0905707106.
29. Oshima, H.; Ishikawa, T.; Yoshida, G.J.; Naoi, K.; Maeda, Y.; Naka, K.; Ju, X.; Yamada, Y.; Minamoto, T.; Mukaida, N., et al. TNF-alpha/TNFR1 signaling promotes gastric tumorigenesis through induction of Nox1 and Gna14 in tumor cells. *Oncogene* **2014**, *33*, 3820-3829, doi:10.1038/onc.2013.356.
30. Fernandes, M.T.; Ghezzi, M.N.; Silveira, A.B.; Kalathur, R.K.; Pova, V.; Ribeiro, A.R.; Brandalise, S.R.; Dejardin, E.; Alves, N.L.; Ghysdael, J., et al. Lymphotoxin-beta receptor in microenvironmental cells promotes the development of T-cell acute lymphoblastic leukaemia with cortical/mature immunophenotype. *Br J Haematol* **2015**, *171*, 736-751, doi:10.1111/bjh.13760.
